# Supplementary figures and images for: Genomic Profiling and Functional Analysis of let-7c miRNA-mRNA Interactions Identify SOX13 to Be Involved in Invasion and Progression of Pancreatic Cancer
Source: Hindawi journal article supplement (doi:10.1155/2020/2951921), 2020-12-24

**A.**

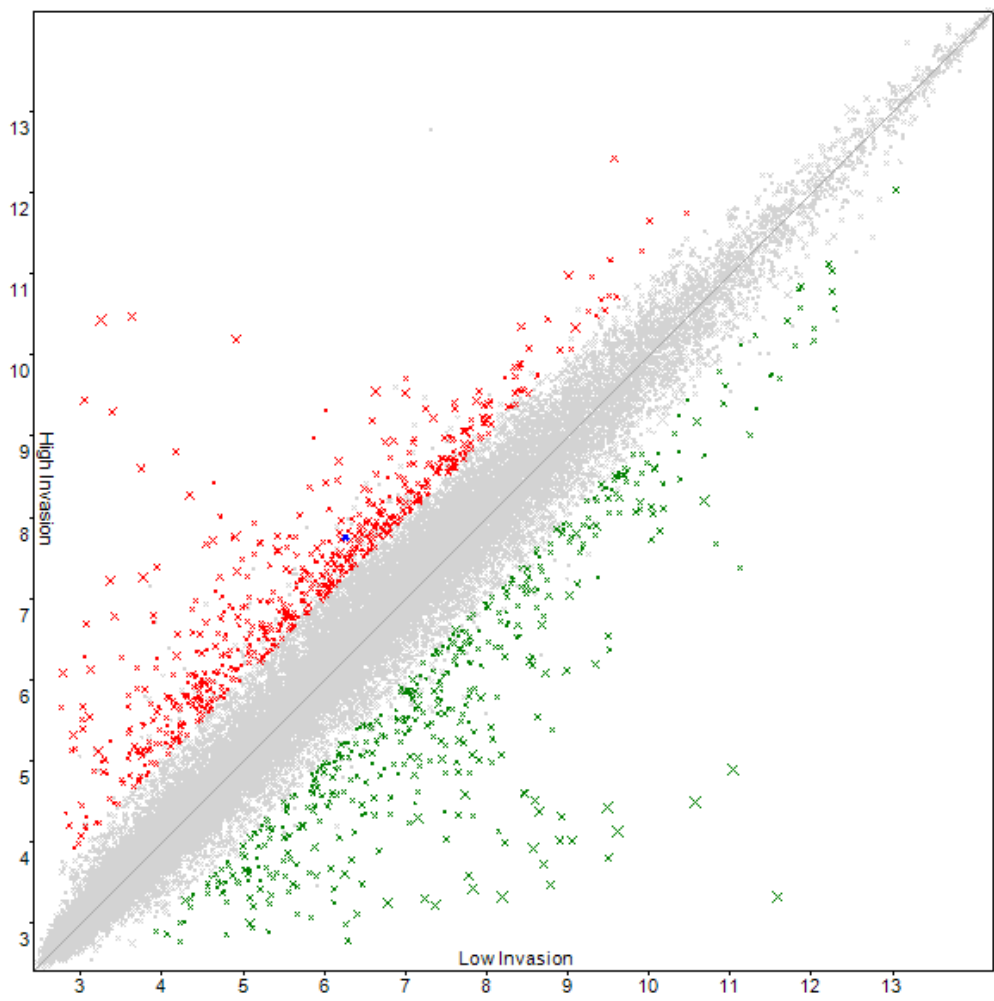

**B.**

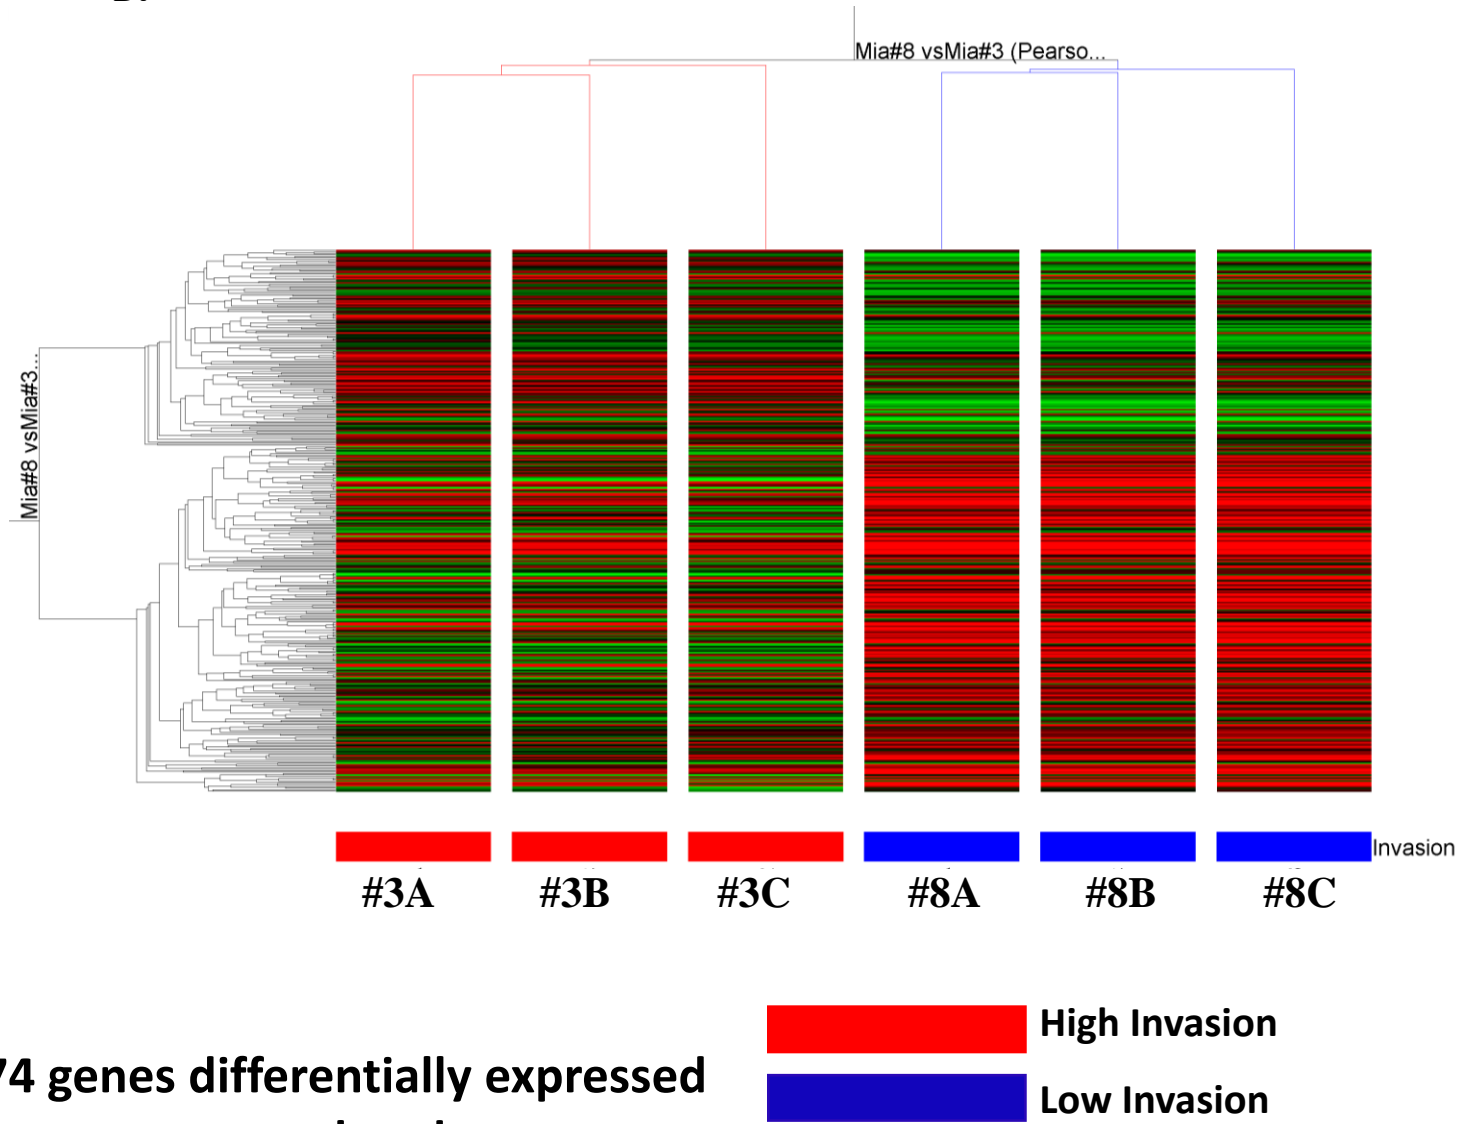

**1074 genes differentially expressed**  
**601 genes up-regulated**  
**473 genes down-regulated**

Supplement: f1 [file 2951921.f1.zip]

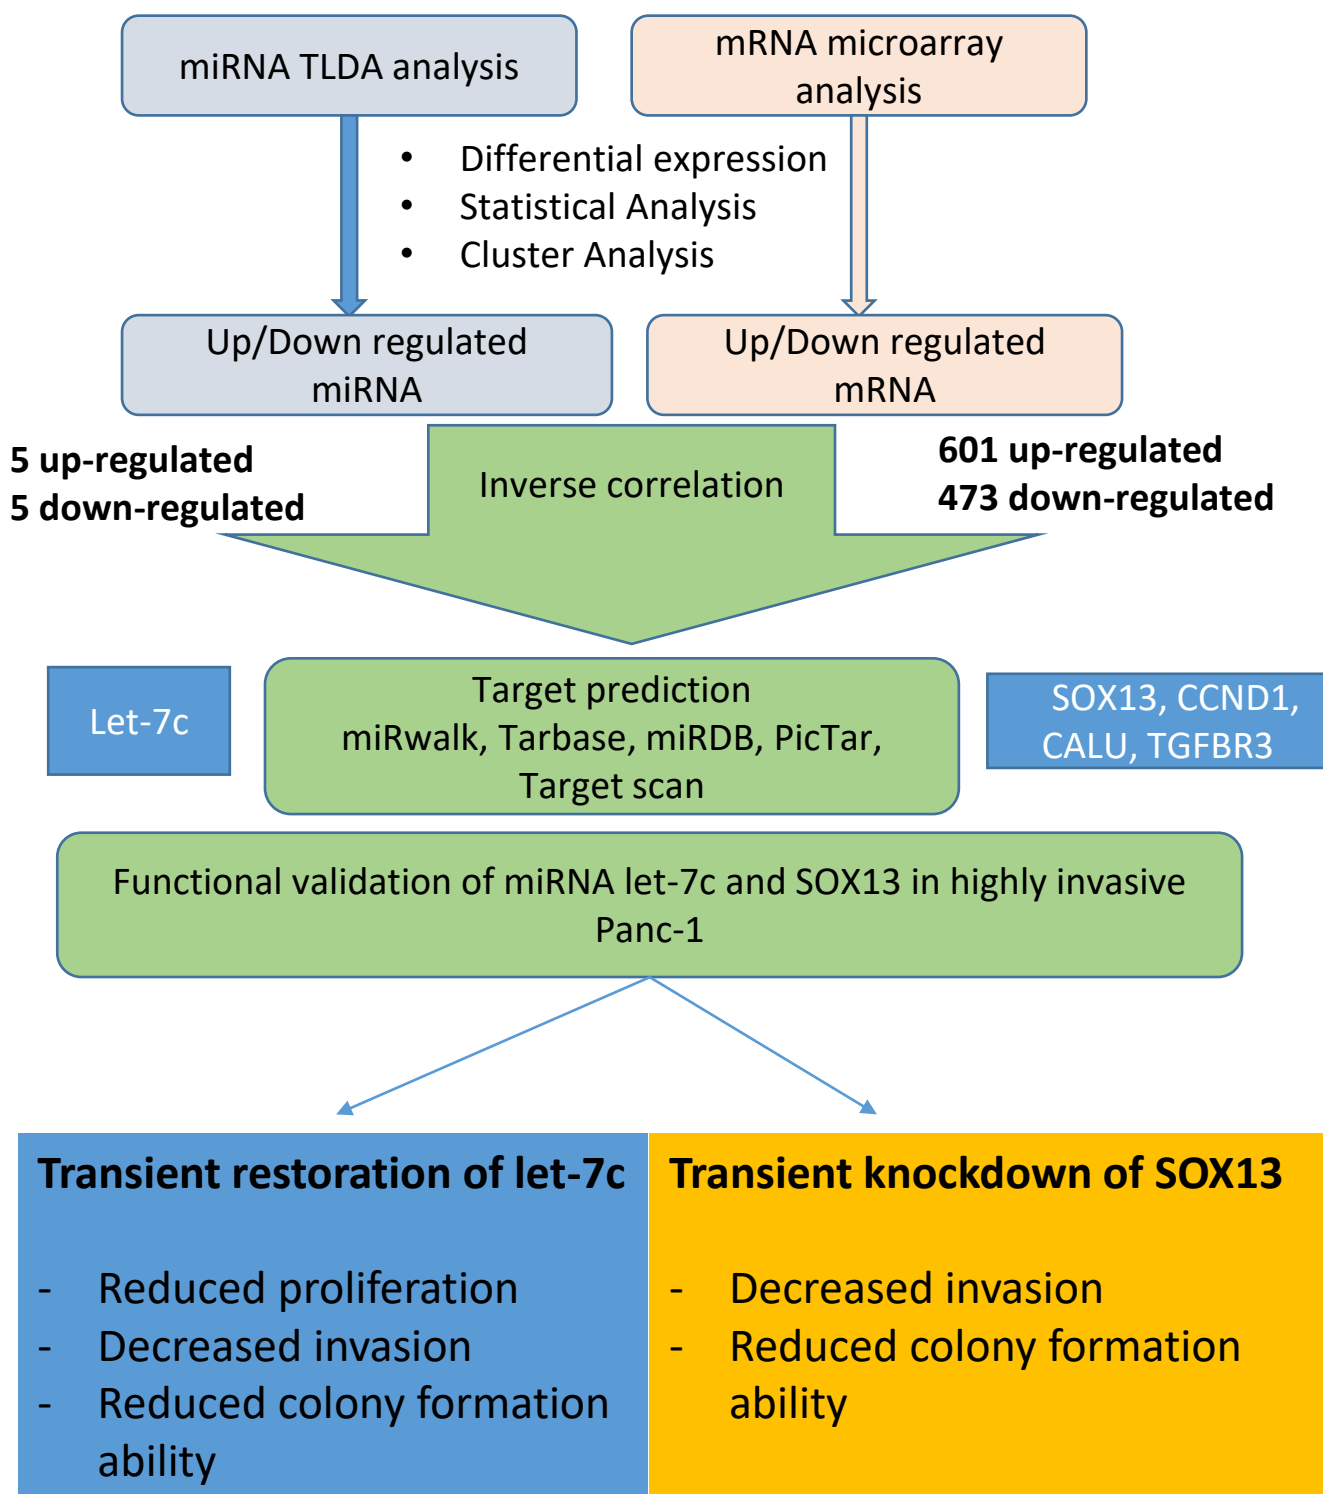

Supplement: f1 [file 2951921.f1.zip]
